# Supplementary material for: Predicting critical illness on initial diagnosis of COVID-19 based on easily-obtained clinical variables: Development and validation of the PRIORITY model
Source: bioRxiv or medRxiv preprint supplement (doi:10.1101/2020.11.27.20237966), 2021-03-21
Supplement: Supplementary file [file media-1.pdf]

## Online Supplementary Figure

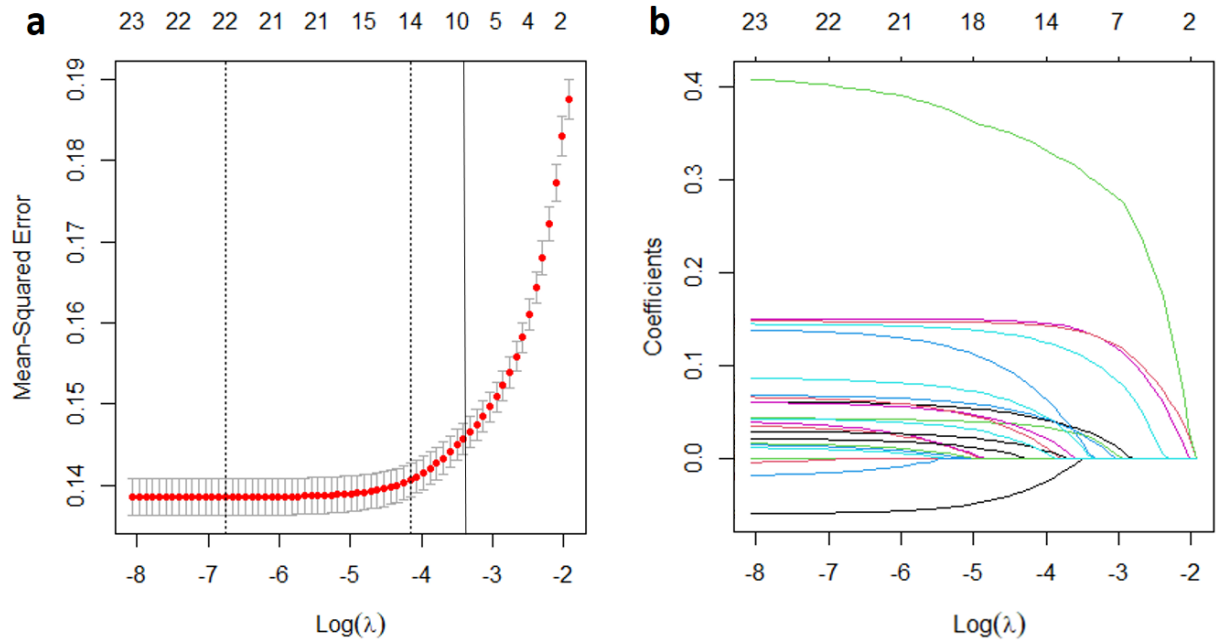

**Figure 1. Selection of predictors using the least absolute shrinkage and selection operator (LASSO) method.** (a) Tuning parameter ( $\lambda$ ) selection from the LASSO model using 10-fold cross-validation via minimum criteria. The mean square error curve was plotted vs.  $\log(\lambda)$ . Dotted vertical lines at the optimal value by the minimum criteria, and the 1 standard error of the minimum criteria. Solid vertical line at the consensus criteria on the maximum number of predictors in the model. (b) LASSO coefficient profiles of the 21 potential predictors, plotted against the  $\log(\lambda)$  sequence.
