# Supplementary material for: Predicting critical illness on initial diagnosis of COVID-19 based on easily-obtained clinical variables: Development and validation of the PRIORITY model
Source: bioRxiv or medRxiv preprint supplement (doi:10.1101/2020.11.27.20237966), 2021-03-21
Supplement: Supplementary file [file media-1.pdf]

## Online Supplementary Figures

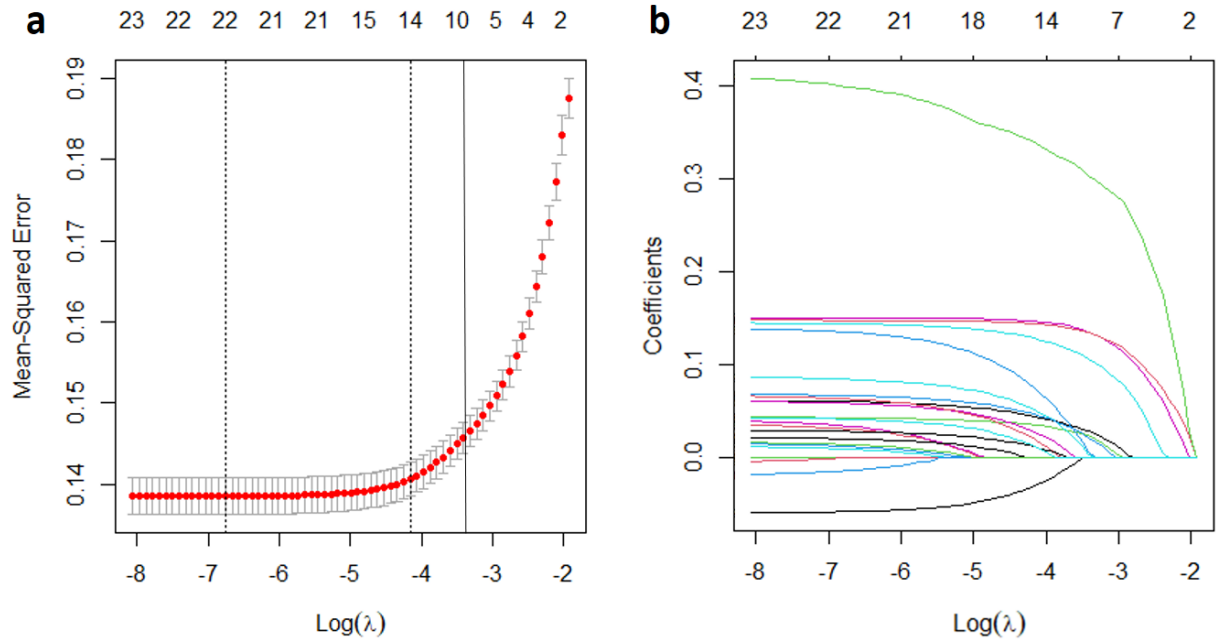

**eFigure 1. Selection of predictors using the least absolute shrinkage and selection operator (LASSO) method.** (a) Tuning parameter ( $\lambda$ ) selection from the LASSO model using 10-fold cross-validation via minimum criteria. The mean square error curve was plotted vs.  $\log(\lambda)$ . Dotted vertical lines at the optimal value by the minimum criteria, and the 1 standard error of the minimum criteria. Solid vertical line at the consensus criteria on the maximum number of predictors in the model. (b) LASSO coefficient profiles of the 21 potential predictors, plotted against the  $\log(\lambda)$  sequence.

## PREDICTING CRITICAL ILLNESS ON INITIAL DIAGNOSIS OF COVID-19: DEVELOPMENT AND VALIDATION OF THE PRIORITY MODEL FOR OUTPATIENT APPLICABILITY. ❤️

### OBJECTIVE

To develop and validate a prediction model, based on clinical history and examination findings on initial diagnosis of COVID-19, to identify patients at risk of critical outcomes.

### DESIGN

National multicenter cohort study.

### MAIN OUTCOME MEASURE

Composite of in-hospital death, mechanical ventilation or admission to intensive care unit.

Research authors: Miguel Martínez-Lacalzada, Adrián Viteri-Noël, Luis Manzano, Marlin Fabregate-Fuente, Manuel Rubio-Rivas, Sara Luis García, Francisco Arnalich Fernández, José Luis Beato Pérez, Juan Antonio Vargas Núñez, Elpidio Calvo Manuel, Alesia-Constanza Espiño, Santiago J. Freire Castro, Jose Loureiro-Arriaga, Paula María Pesqueira Fontana, Adela Pina, Ana María Álvarez Suárez, Andrea Silva Asaín, Beatriz García López, Jairo Luque del Pino, Jaime Sanz Cánovas, Paloma Chazarra Pérez, Gemma María García García, Jesús Millán Núñez-Cortés, José Manuel Casas Rojas, Ricardo Gómez Huelgas

Details | Study characteristics | Files & References

**4.98%** Risk for COVID-19 Critical Illness

See details below.

#### Age

$(\text{Age}/100)^2$

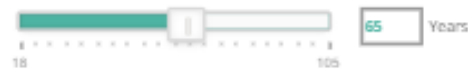

#### Cardiovascular disease

no  Yes

#### Chronic kidney disease

No  Yes

#### Dyspnea

No  Yes

#### Confusion

No  Yes

#### Tachypnea

No  Yes

#### Systolic blood pressure

$1/(\text{SBP}/100)^2$

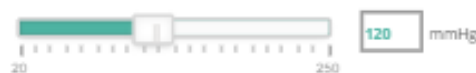

#### SpO2 $\leq$ 93% or oxygen requirement

No  Yes

**eFigure 2. Web-based calculator for predicting critical illness among patients with COVID-19.** Accessible at <https://www.evidencio.com/models/show/2344>.
