# Supplementary material for: Predicting critical illness on initial diagnosis of COVID-19 based on easily-obtained clinical variables: Development and validation of the PRIORITY model
Source: bioRxiv or medRxiv preprint supplement (doi:10.1101/2020.11.27.20237966), 2021-03-21
Supplement: Supplementary file [file media-2.pdf]

# Online Additional Material

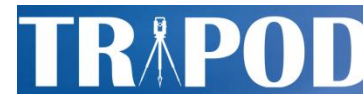

**eTable 1. TRIPOD Checklist for Prediction Model Development and Validation.**

| Section/Topic                |     | Checklist Item | Page                                                                                                                                                                                                  |             |
|------------------------------|-----|----------------|-------------------------------------------------------------------------------------------------------------------------------------------------------------------------------------------------------|-------------|
| <b>Title and abstract</b>    |     |                |                                                                                                                                                                                                       |             |
| Title                        | 1   | D;V            | Identify the study as developing and/or validating a multivariable prediction model, the target population, and the outcome to be predicted.                                                          | 1           |
| Abstract                     | 2   | D;V            | Provide a summary of objectives, study design, setting, participants, sample size, predictors, outcome, statistical analysis, results, and conclusions.                                               | 2-3         |
| <b>Introduction</b>          |     |                |                                                                                                                                                                                                       |             |
| Background and objectives    | 3a  | D;V            | Explain the medical context (including whether diagnostic or prognostic) and rationale for developing or validating the multivariable prediction model, including references to existing models.      | 4           |
|                              | 3b  | D;V            | Specify the objectives, including whether the study describes the development or validation of the model or both.                                                                                     | 5           |
| <b>Methods</b>               |     |                |                                                                                                                                                                                                       |             |
| Source of data               | 4a  | D;V            | Describe the study design or source of data (e.g., randomized trial, cohort, or registry data), separately for the development and validation data sets, if applicable.                               | 5           |
|                              | 4b  | D;V            | Specify the key study dates, including start of accrual; end of accrual; and, if applicable, end of follow-up.                                                                                        | 5           |
| Participants                 | 5a  | D;V            | Specify key elements of the study setting (e.g., primary care, secondary care, general population) including number and location of centers.                                                          | 5           |
|                              | 5b  | D;V            | Describe eligibility criteria for participants.                                                                                                                                                       | 5           |
|                              | 5c  | D;V            | Give details of treatments received, if relevant.                                                                                                                                                     | N/A         |
| Outcome                      | 6a  | D;V            | Clearly define the outcome that is predicted by the prediction model, including how and when assessed.                                                                                                | 6           |
|                              | 6b  | D;V            | Report any actions to blind assessment of the outcome to be predicted.                                                                                                                                | N/A         |
| Predictors                   | 7a  | D;V            | Clearly define all predictors used in developing or validating the multivariable prediction model, including how and when they were measured.                                                         | 6-7         |
|                              | 7b  | D;V            | Report any actions to blind assessment of predictors for the outcome and other predictors.                                                                                                            | N/A         |
| Sample size                  | 8   | D;V            | Explain how the study size was arrived at.                                                                                                                                                            | 5           |
| Missing data                 | 9   | D;V            | Describe how missing data were handled (e.g., complete-case analysis, single imputation, multiple imputation) with details of any imputation method.                                                  | 8           |
| Statistical analysis methods | 10a | D              | Describe how predictors were handled in the analyses.                                                                                                                                                 | 8-9         |
|                              | 10b | D              | Specify type of model, all model-building procedures (including any predictor selection), and method for internal validation.                                                                         | 8-9         |
|                              | 10c | V              | For validation, describe how the predictions were calculated.                                                                                                                                         | 9           |
|                              | 10d | D;V            | Specify all measures used to assess model performance and, if relevant, to compare multiple models.                                                                                                   | 9           |
|                              | 10e | V              | Describe any model updating (e.g., recalibration) arising from the validation, if done.                                                                                                               | N/A         |
| Risk groups                  | 11  | D;V            | Provide details on how risk groups were created, if done.                                                                                                                                             | N/A         |
| Development vs. validation   | 12  | V              | For validation, identify any differences from the development data in setting, eligibility criteria, outcome, and predictors.                                                                         | 9           |
| <b>Results</b>               |     |                |                                                                                                                                                                                                       |             |
| Participants                 | 13a | D;V            | Describe the flow of participants through the study, including the number of participants with and without the outcome and, if applicable, a summary of the follow-up time. A diagram may be helpful. | 10          |
|                              | 13b | D;V            | Describe the characteristics of the participants (basic demographics, clinical features, available predictors), including the number of participants with missing data for predictors and outcome.    | Table 1     |
|                              | 13c | V              | For validation, show a comparison with the development data of the distribution of important variables (demographics, predictors and outcome).                                                        | 12          |
| Model development            | 14a | D              | Specify the number of participants and outcome events in each analysis.                                                                                                                               | 10,12       |
|                              | 14b | D              | If done, report the unadjusted association between each candidate predictor and outcome.                                                                                                              | N/A         |
| Model specification          | 15a | D              | Present the full prediction model to allow predictions for individuals (i.e., all regression coefficients, and model intercept or baseline survival at a given time point).                           | 11, Table 2 |
|                              | 15b | D              | Explain how to use the prediction model.                                                                                                                                                              | 13, Table 3 |
| Model performance            | 16  | D;V            | Report performance measures (with CIs) for the prediction model.                                                                                                                                      | 13          |
| Model-                       | 17  | V              | If done, report the results from any model updating (i.e., model specification, model                                                                                                                 | N/A         |

|                           |     |     |                                                                                                                                                |                     |
|---------------------------|-----|-----|------------------------------------------------------------------------------------------------------------------------------------------------|---------------------|
| updating                  |     |     | performance).                                                                                                                                  |                     |
| <b>Discussion</b>         |     |     |                                                                                                                                                |                     |
| Limitations               | 18  | D;V | Discuss any limitations of the study (such as nonrepresentative sample, few events per predictor, missing data).                               | 14-15               |
| Interpretation            | 19a | V   | For validation, discuss the results with reference to performance in the development data, and any other validation data.                      | 15                  |
|                           | 19b | D;V | Give an overall interpretation of the results, considering objectives, limitations, results from similar studies, and other relevant evidence. | 14-15               |
| Implications              | 20  | D;V | Discuss the potential clinical use of the model and implications for future research.                                                          | 16                  |
| <b>Other information</b>  |     |     |                                                                                                                                                |                     |
| Supplementary information | 21  | D;V | Provide information about the availability of supplementary resources, such as study protocol, Web calculator, and data sets.                  | 11, eFigure 2.      |
| Funding                   | 22  | D;V | Give the source of funding and the role of the funders for the present study.                                                                  | 17, Acknowledgement |
